# Supplementary material
Source: PubMed Central journal article supplement (PMC5536813)
Supplement: JCB709166_supplementary_material.pdf [file JCB709166_supplementary_material.pdf]

## APPENDIX

To derive Equation (2), we make the approximation that the driving pressure  $P_A - CrCP$  in **Figure 2(B)** is linearly related to  $F$ . In the frequency-domain, this so-called Ohms' law for a resistance and capacitance in parallel is

$$\frac{|\mathbf{P}_A(f)| - |\mathbf{CrCP}(f)|}{|\mathbf{F}(f)|} e^{i\phi(f)} = \frac{R}{1 + (2\pi f \tau)^2} (1 - i2\pi f \tau) . \quad (\text{A1})$$

Here,  $|\mathbf{P}_A(f)|$ ,  $|\mathbf{CrCP}(f)|$ , and  $|\mathbf{F}(f)|$  are the Fourier spectral amplitudes of  $P_A$ ,  $CrCP$ , and  $F$ , respectively, at frequency  $f$ ;  $\phi(f)$  is the phase difference between  $P_A$  and  $F$ , and  $\tau \equiv RC$ . The right hand side of Equation (A1) is precisely the complex impedance from a resistance and capacitance in parallel (Windkessel model). Note further, since  $CrCP$  is constant at the heart rate frequency,  $f_{hr}$ , then  $|\mathbf{CrCP}(f_{hr})| = 0$ . Therefore, at the heart rate frequency, Equation (A1) becomes:

$$\frac{|\mathbf{P}_A(f_{hr})|}{|\mathbf{F}(f_{hr})|} e^{i\phi_{hr}} = \frac{R}{\sqrt{1 + (2\pi f_{hr} \tau)^2}} e^{i \arctan(-2\pi f_{hr} \tau)} . \quad (\text{A2})$$

By equating the phases on the left and right hand sides of Equation (A2), we obtain Equation (3) in the main text, *i.e.*  $\tau = -\tan(\phi_{hr}) / (2\pi f_{hr})$ . The resistance is determined by equating the amplitudes on the left and right hand sides of Equation (A2):

$$R = \frac{|\mathbf{P}_A(f_{hr})|}{|\mathbf{F}(f_{hr})|} \sqrt{1 + (2\pi f_{hr} \tau)^2} . \quad (\text{A3})$$

Notice that at  $f = 0$ , Equation (A1) is

$$\frac{\langle P_A \rangle - CrCP}{\langle F \rangle} = R , \quad (\text{A4})$$

where the angular brackets,  $\langle \rangle$ , represent temporal averages.

Equation (2) in the main text is obtained by substitution of Equations (1) and (A3) into Equation (A4) and then solving for  $CrCP$ . Additionally, Equation (4) in the main text (for  $C$ ) was derived from substituting Equation (A4) into the equation  $C = \tau/R$ .

The arteriole compliance  $C$  is also given by the ratio of the mean arteriole blood volume,  $\langle V \rangle$ , and the pressure drop across it, *i.e.*,<sup>1</sup>

$$C = \frac{\langle V \rangle}{\langle P_a \rangle - CrCP}. \quad (A5)$$

Combining Equations (A4) and (A5), we obtain  $\tau \equiv RC = \langle V \rangle / \langle F \rangle$ , which is the vascular transit time for a volume element of blood traversing the arteriole bed.<sup>1</sup>

1. Mandeville JB, Marota JJ, Ayata C, et al. Evidence of a cerebrovascular postarteriole windkessel with delayed compliance. *Journal of Cerebral Blood Flow & Metabolism*. 1999; 19: 679-89.
